# Supplementary material
Source: PubMed Central journal article supplement (PMC3270151)
Supplement: NIHMS326615-supplement-1.pdf [file NIHMS326615-supplement-1.pdf]

Supplemental Table 1. Parent of Origin (POO) analysis of transmission of risk allele (A) for *TNF $\alpha$ -308* promoter SNP (rs1800629) in neonatal lupus (NL) trio cohort

| Transmission from GM          | Mothers with NL Child |                |    |    |
|-------------------------------|-----------------------|----------------|----|----|
|                               |                       | Nontransmitted |    |    |
|                               | Allele                | A              | G  |    |
| Transmitted                   | A                     | 0              | 10 | 10 |
|                               | G                     | 1              | 14 | 15 |
|                               |                       | 1              | 24 | 25 |
| OR=10 CI=(1.42-433.98)        |                       |                |    |    |
| $P_{MAT}=6.66 \times 10^{-3}$ |                       |                |    |    |

$P_{POO}=0.595$

| Transmission from GF | Mothers with NL Child |                |    |    |
|----------------------|-----------------------|----------------|----|----|
|                      |                       | Nontransmitted |    |    |
|                      | Allele                | A              | G  |    |
| Transmitted          | A                     | 3              | 10 | 13 |
|                      | G                     | 2              | 10 | 12 |
|                      |                       | 5              | 20 | 25 |
| OR=5 CI=(1.07-46.93) |                       |                |    |    |
| $P_{PAT}=0.02092$    |                       |                |    |    |

Supplemental Table 2. Parent of Origin (POO) analysis of transmission of risk allele (A) for *TNF $\alpha$ -308* promoter SNP (rs1800629) in cardiac neonatal lupus (NL) trio cohort

| Transmission from GM          | Mothers with Cardiac NL Child |                |      |      |
|-------------------------------|-------------------------------|----------------|------|------|
|                               |                               | Nontransmitted |      |      |
|                               | Allele                        | A              | G    |      |
| Transmitted                   | A                             | 0              | 8.5  | 8.5  |
|                               | G                             | 0.5            | 12   | 12.5 |
|                               |                               | 0.5            | 20.5 | 21   |
| OR=17 CI=(1.71-infinity)      |                               |                |      |      |
| $P_{MAT}=7.66 \times 10^{-3}$ |                               |                |      |      |

$P_{POO}=0.4737$

| Transmission from GF | Mothers with Cardiac NL Child |                |      |      |
|----------------------|-------------------------------|----------------|------|------|
|                      |                               | Nontransmitted |      |      |
|                      | Allele                        | A              | G    |      |
| Transmitted          | A                             | 3              | 7.5  | 10.5 |
|                      | G                             | 1.5            | 9    | 10.5 |
|                      |                               | 4.5            | 16.5 | 21   |
| OR=5 CI=(0.80-38.67) |                               |                |      |      |
| $P_{PAT}=0.0455$     |                               |                |      |      |

Supplemental Table 3. Parent of Origin (POO) analysis of transmission of risk allele (A) for *TNF $\alpha$ -308* promoter SNP (rs1800629) in Caucasian cardiac neonatal lupus (NL) trio cohort

| Transmission from GM | Caucasian Mothers with Cardiac NL Child |                |      |      |
|----------------------|-----------------------------------------|----------------|------|------|
|                      |                                         | Nontransmitted |      |      |
|                      | Allele                                  | A              | G    |      |
| Transmitted          | A                                       | 0              | 8.5  | 8.5  |
|                      | G                                       | 0.5            | 12   | 12.5 |
|                      |                                         | 0.5            | 20.5 | 21   |
|                      | OR=17 CI=(1.71-infinity)                |                |      |      |
|                      | $P_{MAT}=7.66 \times 10^{-3}$           |                |      |      |

$P_{POO}=0.4737$

| Transmission from GF | Caucasian Mothers with Cardiac NL Child |                |      |      |
|----------------------|-----------------------------------------|----------------|------|------|
|                      |                                         | Nontransmitted |      |      |
|                      | Allele                                  | A              | G    |      |
| Transmitted          | A                                       | 3              | 7.5  | 10.5 |
|                      | G                                       | 1.5            | 9    | 10.5 |
|                      |                                         | 4.5            | 16.5 | 21   |
|                      | OR=5 CI=(0.80-38.67)                    |                |      |      |
|                      | $P_{PAT}=0.0455$                        |                |      |      |

Supplemental Table 4. Parent of Origin (POO) analysis of transmission of risk allele (G) for *C6orf10* SNP (rs7775397) in neonatal lupus (NL) trio cohort

| Transmission from GM | Mothers with NL Child         |                |    |    |
|----------------------|-------------------------------|----------------|----|----|
|                      |                               | Nontransmitted |    |    |
|                      | Allele                        | A              | G  |    |
| Transmitted          | A                             | 0              | 7  | 7  |
|                      | G                             | 0              | 19 | 19 |
|                      |                               | 0              | 26 | 26 |
|                      | OR=15 CI=(1.44-infinity)      |                |    |    |
|                      | $P_{MAT}=1.57 \times 10^{-3}$ |                |    |    |

$P_{POO}=NA$

| Transmission from GF | Mothers with NL Child         |                |    |    |
|----------------------|-------------------------------|----------------|----|----|
|                      |                               | Nontransmitted |    |    |
|                      | Allele                        | A              | G  |    |
| Transmitted          | A                             | 1              | 10 | 11 |
|                      | G                             | 0              | 15 | 15 |
|                      |                               | 1              | 25 | 26 |
|                      | OR=21 CI=(2.24-infinity)      |                |    |    |
|                      | $P_{PAT}=8.15 \times 10^{-3}$ |                |    |    |

Supplemental Table 5. Parent of Origin (POO) analysis of transmission of risk allele (G) for *C6orf10* SNP (rs7775397) in cardiac neonatal lupus (NL) trio cohort

| Transmission from GM     | Mothers with Cardiac NL Child |                |    |    |
|--------------------------|-------------------------------|----------------|----|----|
|                          |                               | Nontransmitted |    |    |
|                          | Allele                        | A              | G  |    |
| Transmitted              | A                             | 0              | 6  | 6  |
|                          | G                             | 0              | 16 | 16 |
|                          |                               | 0              | 22 | 22 |
| OR=13 CI=(1.18-infinity) |                               |                |    |    |
| $P_{MAT}=0.014$          |                               |                |    |    |

| Transmission from GF         | Mothers with Cardiac NL Child |                |    |    |
|------------------------------|-------------------------------|----------------|----|----|
|                              |                               | Nontransmitted |    |    |
|                              | Allele                        | A              | G  |    |
| Transmitted                  | A                             | 1              | 9  | 10 |
|                              | G                             | 0              | 12 | 12 |
|                              |                               | 1              | 21 | 22 |
| OR=19 CI=(1.97-infinity)     |                               |                |    |    |
| $P_{PAT}=2.7 \times 10^{-3}$ |                               |                |    |    |

$P_{POO}=NA$

Supplemental Table 6. Parent of Origin (POO) analysis of transmission of risk allele (G) for *C6orf10* SNP (rs7775397) in Caucasian cardiac neonatal lupus (NL) trio cohort

| Transmission from GM     | Caucasian Mothers with Cardiac NL Child |                |    |    |
|--------------------------|-----------------------------------------|----------------|----|----|
|                          |                                         | Nontransmitted |    |    |
|                          | Allele                                  | A              | G  |    |
| Transmitted              | A                                       | 0              | 6  | 6  |
|                          | G                                       | 0              | 16 | 16 |
|                          |                                         | 0              | 22 | 22 |
| OR=13 CI=(1.18-infinity) |                                         |                |    |    |
| $P_{MAT}=0.014$          |                                         |                |    |    |

| Transmission from GF         | Caucasian Mothers with Cardiac NL Child |                |    |    |
|------------------------------|-----------------------------------------|----------------|----|----|
|                              |                                         | Nontransmitted |    |    |
|                              | Allele                                  | A              | G  |    |
| Transmitted                  | A                                       | 1              | 9  | 10 |
|                              | G                                       | 0              | 12 | 12 |
|                              |                                         | 1              | 21 | 22 |
| OR=19 CI=(1.97-infinity)     |                                         |                |    |    |
| $P_{PAT}=2.7 \times 10^{-3}$ |                                         |                |    |    |

$P_{POO}=NA$
